# Supplementary material for: Effect of dissolved solids released from biochar on soil microbial metabolism
Source: Royal Society of Chemistry journal article supplement (doi:10.1039/d2em00036a), 2022-01-01
Supplement: d2em00036a1.pdf [file d2em00036a1.pdf]

# Supplementary Material

## Effect of dissolved solids released from biochar on soil microbial metabolism

### *Contents*

---

|                                                                                                                                   | <b>page</b> |
|-----------------------------------------------------------------------------------------------------------------------------------|-------------|
| <b>Fig. S1</b> The UPGMA dendrogram based on microbial community structure similarity generated from Jaccard's similarity values. | <b>S1</b>   |
| <b>Table S1</b> Correlations between the variables                                                                                | <b>S2</b>   |
| <b>Table S2</b> Biodiversity indexes of samples                                                                                   | <b>S4</b>   |

---

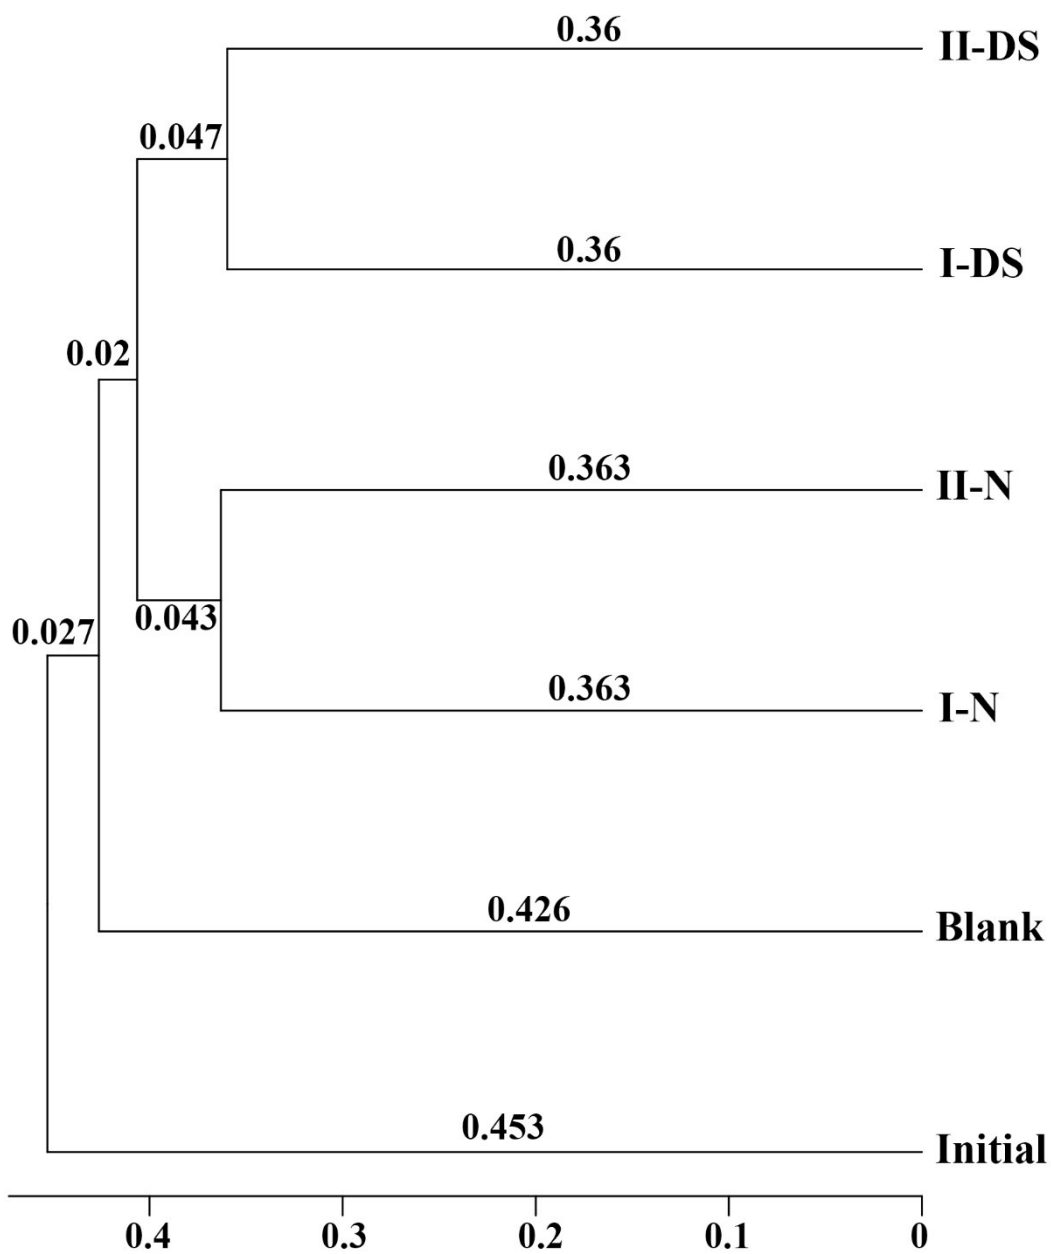

Fig. S1 The UPGMA dendrogram based on microbial community structure similarity generated from Jaccard's similarity values.

Table S1 Correlations between the variables

|                                 |   | ATP           | ADP/ATP ratio | NADH         | NAD/NADH ratio | NADPH         | NADP/NADPH ratio | Extracellular protein | Extracellular polysaccharide | TDS           | TOC           | ATP/NADPH ratio | NADH/NADPH ratio |
|---------------------------------|---|---------------|---------------|--------------|----------------|---------------|------------------|-----------------------|------------------------------|---------------|---------------|-----------------|------------------|
| DSRB                            | S | <b>0.510</b>  | <b>-0.521</b> | <b>0.611</b> | <b>-0.362</b>  | <b>0.600</b>  | -0.317           | -0.102                | -0.147                       | <b>0.849</b>  | <b>0.634</b>  | 0.181           | <b>-0.442</b>    |
|                                 | P | <b>0.005</b>  | <b>0.004</b>  | <b>0.001</b> | <b>0.038</b>   | <b>0.001</b>  | 0.061            | 0.314                 | 0.241                        | <b>0.000</b>  | <b>0.000</b>  | 0.193           | <b>0.014</b>     |
| <i>Ochrobactrum</i> sp. WH-2    | S | -0.181        | -0.125        | -0.011       | -0.181         | 0.062         | 0.000            | -0.023                | 0.260                        | 0.260         | <b>0.385</b>  | -0.272          | -0.136           |
|                                 | P | 0.193         | 0.277         | 0.479        | 0.193          | 0.384         | 0.500            | 0.457                 | 0.104                        | 0.104         | <b>0.029</b>  | 0.094           | 0.259            |
| <i>Castellaniella</i> sp. WH-14 | S | <b>0.747</b>  | <b>-0.396</b> | <b>0.442</b> | 0.034          | <b>0.504</b>  | <b>-0.396</b>    | 0.193                 | 0.170                        | 0.306         | 0.113         | <b>0.668</b>    | <b>-0.430</b>    |
|                                 | P | <b>0.000</b>  | <b>0.025</b>  | <b>0.014</b> | 0.436          | <b>0.005</b>  | <b>0.025</b>     | 0.178                 | 0.208                        | 0.069         | 0.295         | <b>0.000</b>    | <b>0.016</b>     |
| Time                            | S | -0.239        | <b>0.482</b>  | <b>0.565</b> | 0.208          | 0.114         | <b>0.365</b>     | <b>-0.794</b>         | 0.263                        | 0.184         | 0.137         | -0.267          | 0.075            |
|                                 | P | 0.125         | <b>0.007</b>  | <b>0.002</b> | 0.159          | 0.294         | <b>0.036</b>     | <b>0.000</b>          | 0.102                        | 0.189         | 0.256         | 0.099           | 0.362            |
| ATP                             | S | --            | <b>-0.755</b> | <b>0.448</b> | -0.174         | <b>0.725</b>  | <b>-0.651</b>    | 0.290                 | 0.086                        | <b>0.661</b>  | <b>0.526</b>  | <b>0.748</b>    | <b>-0.722</b>    |
|                                 | P | --            | <b>0.000</b>  | <b>0.012</b> | 0.203          | <b>0.000</b>  | <b>0.000</b>     | 0.080                 | 0.341                        | <b>0.000</b>  | <b>0.003</b>  | <b>0.000</b>    | <b>0.000</b>     |
| ADP/ATP ratio                   | S | <b>-0.755</b> | --            | -0.298       | <b>0.350</b>   | <b>-0.400</b> | <b>0.372</b>     | <b>-0.430</b>         | -0.085                       | <b>-0.535</b> | <b>-0.485</b> | <b>-0.660</b>   | <b>0.417</b>     |
|                                 | P | <b>0.000</b>  | --            | 0.074        | <b>0.043</b>   | <b>0.024</b>  | <b>0.033</b>     | <b>0.016</b>          | 0.344                        | <b>0.003</b>  | <b>0.007</b>  | <b>0.000</b>    | <b>0.019</b>     |
| NADH                            | S | <b>0.448</b>  | -0.298        | --           | -0.172         | <b>0.611</b>  | 0.021            | <b>-0.470</b>         | 0.268                        | <b>0.729</b>  | <b>0.465</b>  | 0.264           | <b>-0.344</b>    |
|                                 | P | <b>0.012</b>  | 0.074         | --           | 0.205          | <b>0.001</b>  | 0.461            | <b>0.009</b>          | 0.097                        | <b>0.000</b>  | <b>0.010</b>  | 0.101           | <b>0.046</b>     |
| NAD <sup>+</sup> /NADH ratio    | S | -0.174        | <b>0.350</b>  | -0.172       | --             | -0.170        | 0.125            | -0.202                | 0.025                        | -0.313        | -0.087        | 0.020           | 0.107            |
|                                 | P | 0.203         | <b>0.043</b>  | 0.205        | --             | 0.208         | 0.275            | 0.166                 | 0.454                        | 0.064         | 0.340         | 0.462           | 0.305            |
| NADPH                           | S | <b>0.725</b>  | <b>-0.400</b> | <b>0.611</b> | -0.170         | --            | <b>-0.692</b>    | -0.072                | 0.243                        | <b>0.776</b>  | <b>0.607</b>  | 0.219           | <b>-0.934</b>    |
|                                 | P | <b>0.000</b>  | <b>0.024</b>  | <b>0.001</b> | 0.208          | --            | <b>0.000</b>     | 0.366                 | 0.121                        | <b>0.000</b>  | <b>0.001</b>  | 0.146           | <b>0.000</b>     |

|                                   |   | ATP           | ADP/ATP<br>P ratio | NADH          | NAD/NADH<br>ratio | NADPH         | NADP/NADPH<br>ratio | Extracellular<br>protein | Extracellular<br>polysaccharide | TDS           | TOC           | ATP/NADP<br>H ratio | NADH/NADPH<br>ratio |
|-----------------------------------|---|---------------|--------------------|---------------|-------------------|---------------|---------------------|--------------------------|---------------------------------|---------------|---------------|---------------------|---------------------|
| NADP <sup>+</sup> /NADPH<br>ratio | S | <b>-0.651</b> | <b>0.372</b>       | 0.021         | 0.125             | <b>-0.692</b> | --                  | <b>-0.383</b>            | -0.170                          | <b>-0.415</b> | <b>-0.387</b> | -0.268              | <b>0.842</b>        |
|                                   | P | <b>0.000</b>  | <b>0.033</b>       | 0.461         | 0.275             | <b>0.000</b>  | --                  | <b>0.029</b>             | 0.208                           | <b>0.019</b>  | <b>0.028</b>  | 0.098               | <b>0.000</b>        |
| Extracellular<br>protein          | S | 0.290         | <b>-0.430</b>      | <b>-0.470</b> | -0.202            | -0.072        | <b>-0.383</b>       | --                       | 0.057                           | -0.140        | -0.143        | 0.325               | -0.139              |
|                                   | P | 0.080         | <b>0.016</b>       | <b>0.009</b>  | 0.166             | 0.366         | <b>0.029</b>        | --                       | 0.394                           | 0.253         | 0.247         | 0.056               | 0.254               |
| Extracellular<br>polysaccharide   | S | 0.086         | -0.085             | 0.268         | 0.025             | 0.243         | -0.170              | 0.057                    | --                              | 0.089         | 0.118         | -0.015              | -0.282              |
|                                   | P | 0.341         | 0.344              | 0.097         | 0.454             | 0.121         | 0.208               | 0.394                    | --                              | 0.336         | 0.286         | 0.472               | 0.086               |
| TDS                               | S | <b>0.661</b>  | <b>-0.535</b>      | <b>0.729</b>  | -0.313            | <b>0.776</b>  | <b>-0.415</b>       | -0.140                   | 0.089                           | --            | <b>0.824</b>  | 0.278               | <b>-0.640</b>       |
|                                   | P | <b>0.000</b>  | <b>0.003</b>       | <b>0.000</b>  | 0.064             | <b>0.000</b>  | <b>0.019</b>        | 0.253                    | 0.336                           | --            | <b>0.000</b>  | 0.089               | <b>0.000</b>        |
| TOC                               | S | <b>0.526</b>  | <b>-0.485</b>      | <b>0.465</b>  | -0.087            | <b>0.607</b>  | <b>-0.387</b>       | -0.143                   | 0.118                           | <b>0.824</b>  | --            | 0.119               | <b>-0.560</b>       |
|                                   | P | <b>0.003</b>  | <b>0.007</b>       | <b>0.010</b>  | 0.340             | <b>0.001</b>  | <b>0.028</b>        | 0.247                    | 0.286                           | <b>0.000</b>  | --            | 0.285               | <b>0.002</b>        |
| ATP/NADPH<br>ratio                | S | <b>0.748</b>  | <b>-0.660</b>      | 0.264         | 0.020             | 0.219         | -0.268              | 0.325                    | -0.015                          | 0.278         | 0.119         | --                  | -0.239              |
|                                   | P | <b>0.000</b>  | <b>0.000</b>       | 0.101         | 0.462             | 0.146         | 0.098               | 0.056                    | 0.472                           | 0.089         | 0.285         | --                  | 0.125               |

S is the Spearman correlation coefficient. *Ochrobactrum* sp. WH-2 and *Castellaniella* sp. WH-14 were set as dummy variables with “not added” set at level 0 and “added” at level 1. Results of 0.000 mean <0.001.

Table S2 Biodiversity indexes of samples

| Sample  | Culture Time (d) | Chao1 | Shannon |
|---------|------------------|-------|---------|
| Initial | 0                | 1068  | 5.85    |
| Blank   | 10               | 1169  | 6.01    |
| I-N     | 10               | 988   | 3.22    |
| I-DS    | 10               | 1485  | 4.30    |
| II-N    | 10               | 1287  | 5.01    |
| II-DS   | 10               | 1338  | 4.58    |
